# Supplementary material for: Identification of SSR Markers Associated with Yield-Related Traits and Heterosis Effect in Winter Oilseed Rape (Brassica Napus L.)
Source: MDPI journal article supplement (doi:10.3390/agronomy12071544), 2022-06-28
Supplement: s1 [file s1]

**Table S1.** Total sets of 89 SSR primers used for the initial polymorphism analysis (Li et al. 2013).

| Marker Name | Seq ID    | Locus (cM) | LGs in <i>B. napus</i> | Motif  | Left Primer                | Right Primer                | Left Primer TM | Right Primer TM | Product Size (bp) |
|-------------|-----------|------------|------------------------|--------|----------------------------|-----------------------------|----------------|-----------------|-------------------|
| BrGMS2864   | 199579959 | 27.142     | A1                     | (AT)10 | GGGTCCTTGGTACCATATTT<br>GC | TATTCTCGGTCTGTTCCACC<br>TT  | 61.63          | 60.00           | 207               |
| BrEMS0015   | 150126072 | 66.459     | A1                     | (AG)16 | GATCACCAGTGAAGTGA          | GCTTCTGTAGCAGAGGAA<br>A     | 51.47          | 54.99           | 384               |
| BrGMS4031   | 225936614 | 88.15      | A1                     | (AT)9  | CTCGAGTATTGTGTGGCGAG<br>TA | TGCAGGATTAGTCAGAATC<br>CAA  | 60.33          | 59.71           | 200               |
| BrGMS2431   | 184185743 | 96.323     | A1                     | (AG)10 | GGTTTGGGCTTCTAGGAAAC<br>AT | GATAGACCAGAGCAGACC<br>AGAAA | 60.69          | 59.90           | 203               |
| BrGMS4320   | 242246639 | 102.81     | A1                     | (AT)23 | TTGGGTAACAGATAACCCAT<br>GC | CAACTCCACCCTCTTACAGT<br>CC  | 60.96          | 60.03           | 204               |
| BrGMS0667   | 110797058 | 13.375     | A2                     | (AAG)8 | TCTTCTTCTCCTCATCCCCTT      | GGATTCTCACTTCGGAGAC<br>CTA  | 60.55          | 59.71           | 170               |
| BnGMS0103   | 73686895  | 34.241     | A2                     | (ACT)6 | GTGAGTGGAAACGTTCTAGC       | AAGACTGTTACGGCTCGTC         | 55.01          | 55.46           | 207               |
| BnGMS0945   | 206707092 | 40.568     | A2                     | (AT)6  | AGTGTGAGCCCTCAGAGAA<br>C   | CACATCTCTTGGAAATGCA<br>AAC  | 60.84          | 59.61           | 167               |
| BrGMS1436   | 110797339 | 74.153     | A2                     | (AG)10 | CATAATCAACGAGCATGAG<br>CTT | GTGTTTGGTATTTGGGCTTC<br>TC  | 60.08          | 59.89           | 184               |
| BrGMS3807   | 223950802 | 76.054     | A2                     | (AG)9  | AACCTTGAGGACCCATATCC<br>TT | GGAGACATGGACATGATGA<br>CTG  | 60.08          | 60.40           | 211               |
| BrGMS3582   | 215414365 | 29.839     | A3                     | (ACT)4 | TTAACAAGACGGGCCTTACG       | TGCTAATCTCATAAGCCGA<br>TCA  | 60.12          | 59.84           | 207               |
| BrGMS1490   | 110796974 | 55.786     | A3                     | (AT)10 | ATCAAATCATCCTCCTCTCC<br>AC | ATTTCACCATCCAATTCCCA        | 58.30          | 57.35           | 384               |
| BrGMS3041   | 199580111 | 84.923     | A3                     | (AG)10 | TCACTCACGACTTCATCCTA<br>CG | ACCAGAAGGTTACAGAGGT<br>GCT  | 60.31          | 59.32           | 178               |
| BrGMS2498   | 184185761 | 118.259    | A3                     | (AAG)5 | AGGAAACTTTCACCGAGTGC<br>TA | AATTGTGTTCTGTGTTGAGCA<br>GT | 60.29          | 59.71           | 158               |
| BrGMS4057   | 228007519 | 119.531    | A3                     | (AT)10 | AGCACAGGAGTGAGACAA<br>CAT  | GCTAATGTGTCATCAGCTTT<br>CC  | 61.14          | 58.86           | 189               |

|               |                  |             |    |              |                                                       |             |     |
|---------------|------------------|-------------|----|--------------|-------------------------------------------------------|-------------|-----|
| BrGMS1450     | 110743982        | 134.46<br>6 | A3 | (ATC)7       | TGCTATCAACGAGACAATCC AGACGATGACGATGAGAAT<br>TG GTG    | 60.24 60.05 | 187 |
| BrGMS1713     | 110797248        | 68.431      | A4 | (AG)15       | AGGATTAGGCTGTTGAATGC AGAGAGAATCGTCATGGAG<br>TT GAG    | 60.06 60.45 | 173 |
| BrGMS4027     | 225936613        | 69.909      | A4 | (AGG)5       | ATCCGCATTGTCTCCATTAG CCTGCTTACAGGAGAAGAG<br>AT GAA    | 59.83 60.01 | 198 |
| BnGMS061<br>5 | 73681385         | 3.362       | A5 | (AT)8        | GGCACGGATCTTAACCTAGT TCAAGGGCTTTCATATCTTG             | 55.92 55.47 | 163 |
| BrGMS2252     | 184185696        | 27.532      | A5 | (AAG)6       | GCACATGATCACAAAGATCT ATTACCTTCGGTCTCGGTTT<br>CA AT    | 58.73 61.07 | 200 |
| BrGMS4110     | 239500637        | 36.957      | A5 | (AAG)12      | CAAGAATCCGACCCAAGTTT TGA CTATGGATGATCGATTT<br>A GG    | 59.07 59.78 | 139 |
| BrGMS1804     | 110797227        | 44.56       | A5 | (AT)10       | CACAGTTGGGTATATTTGTA ACGATCCCCGTAGTAAAAG<br>AGTGC ATT | 60.43 60.22 | 305 |
| BnGMS066<br>2 | 73679878         | 58.488      | A5 | (AT)8        | CGATCGAATTGCACTGTACT ATGCACAGAGCTGAAGAA<br>AT         | 56.39 55.09 | 205 |
| BrGMS3653     | 223941022        | 26.348      | A6 | (AC)18       | AGCTGTGAGAACAGTGACATGAATGGAACCAAGTGACAT<br>GG CAA     | 60.37 59.84 | 156 |
| BrEMS0005     | 150124838        | 31.583      | A6 | (AAG)12      | AGGAGTTCAAAGAGGAAAC TCCTCATCTTCACCATCTTC<br>C         | 55.00 55.06 | 316 |
| BrGMS1894     | 110797247        | 72.022      | A6 | (AG)16       | AAAGGGGACGTAGAACAAG GTCACACA ACTAGGACACA<br>TGA GCC   | 60.28 60.41 | 334 |
| BrGMS3750     | 223950785        | 116.99<br>1 | A6 | (ATC)6       | GTTGGGCAAAGGTATGATGT TCCATAAATCGCCAGCTAT<br>AA CAT    | 58.88 60.79 | 216 |
| BrGMS4194     | 242246606        | 162.76<br>7 | A6 | (ATG)8       | GCATCATCAATTGGCATATG ATCTCTCGAATCGGTGTTCT<br>AG TC    | 60.32 59.72 | 208 |
| BnEMS062<br>0 | >TA4381_3<br>708 | 26.69       | A7 | (AG)10       | TCCTCTCAATTTCTTCAGGA AAGATTCATGCCACTTCAA<br>C         | 54.96 55.19 | 177 |
| BrGMS2989     | 199580069        | 33.514      | A7 | (AG)9        | GTTCAACAGGCTCAATTCTG AGCTCCTGAAATTTAGCAA<br>TT AGC    | 60.54 59.21 | 196 |
| BrGMS3837     | 223950810        | 46.998      | A7 | (AT)7        | GCAGAACCGGATAGAATGT CCAATTCATGCCTAAGTG<br>GTA GTA     | 59.11 59.01 | 298 |
| BnEMS052<br>5 | >TA2600_3<br>708 | 56.288      | A7 | (AAACC)<br>4 | GCATTCTTATTTGAGCAATC GATCAAGCCAATAGATTGT<br>A         | 54.96 50.32 | 165 |
| BnGMS037<br>3 | 73676918         | 13.19       | A8 | (AT)12       | CAGATAAATTTGGGTAGCTC TATGGATCTGGAAACTCGA<br>A A       | 54.70 55.73 | 279 |

|               |           |        |     |         |                       |                       |       |       |     |
|---------------|-----------|--------|-----|---------|-----------------------|-----------------------|-------|-------|-----|
| BrGMS2244     | 184185694 | 29.977 | A8  | (AT)8   | CCCAAAGCGTATAGCATAGT  | TGTGCGCGTAGTCTTTAGTT  | 60.01 | 59.60 | 263 |
|               |           |        |     |         | CC                    | TC                    |       |       |     |
| BrGMS2025     | 82654442  | 39.226 | A8  | (AGG)7  | CATTGCATCTGACTCTCACC  | CAAGCAGCCTAAGAAGGA    | 60.02 | 60.26 | 108 |
|               |           |        |     |         | AT                    | GTGT                  |       |       |     |
| BrGMS0742     | 110744058 | 67.802 | A8  | (AG)14  | ACACGTTGAAGCAAGTCACC  | CAAAGTCCTTCCAAAACCA   | 59.84 | 59.89 | 135 |
|               |           |        |     |         | TA                    | AAC                   |       |       |     |
| BrGMS2375     | 184185728 | 74.53  | A8  | (ACT)7  | TGGCAAGAGAGTCACATTTG  | GATTGTGCTGTGTCTCTGTG  | 59.78 | 60.23 | 199 |
|               |           |        |     |         | TT                    | GT                    |       |       |     |
| BnEMS016<br>9 | 65294417  | 9.811  | A9  | (AG)11  | ATCGCTTCATCAGCAAGA    | AGAGACACGACAGAACAC    | 55.33 | 55.45 | 218 |
|               |           |        |     |         |                       | AAG                   |       |       |     |
| BnGMS001<br>4 | 73681333  | 13.118 | A9  | (AAG)6  | ATCCGAAGAGAGGATAGAG   | GTATGGACGACGAATCATC   | 55.04 | 54.97 | 299 |
|               |           |        |     |         | G                     | T                     |       |       |     |
| BrGMS4252     | 242246622 | 55.124 | A9  | (AT)17  | GCCGACCCTAGTAGACCATA  | AATCAGATGACCATGGGTTT  | 59.18 | 59.66 | 286 |
|               |           |        |     |         | AG                    | G                     |       |       |     |
| BnGMS071<br>3 | 206701672 | 70.936 | A9  | (AG)24  | CCTCCGTGTATTCTTTTCCTG | CAGGTCCATATCATACAAC   | 58.70 | 57.51 | 173 |
|               |           |        |     |         |                       | TTCC                  |       |       |     |
| BrGMS0366     | 110744040 | 89.347 | A9  | (AAC)8  | TTTGCCGAGTAACCTTTGTCA | AAAGTTGGGCTTTTAGCTTT  | 60.88 | 60.13 | 307 |
|               |           |        |     |         | T                     | CC                    |       |       |     |
| BrGMS3688     | 223950765 | 38.725 | A10 | (AG)9   | GTTGAATTGCCTCCAGTGAG  | TTAGACGCAATGGTAAGA    | 60.54 | 59.91 | 173 |
|               |           |        |     |         | TT                    | GCA                   |       |       |     |
| BrGMS3755     | 223950788 | 45.342 | A10 | (AG)9   | TTATCAAGGGATTTCGGTTTG | GATTGCAGCTTTATCATCCA  | 60.18 | 60.10 | 189 |
|               |           |        |     |         | AC                    | CA                    |       |       |     |
| BrGMS1218     | 199580196 | 46.339 | A10 | (AAG)6  | GCGACCAAACACGTAAGAG   | ATCATCGAAAGCCCCATAA   | 59.93 | 59.81 | 260 |
|               |           |        |     |         | AG                    | GT                    |       |       |     |
| BrGMS0086     | 110797244 | 52.617 | A10 | (AG)16  | ATATCCCAACACCGCACTAA  | TTCGTCTTCATCTACGCTCA  | 60.14 | 60.02 | 314 |
|               |           |        |     |         | AC                    | AA                    |       |       |     |
| BnEMS004<br>8 | 32515199  | 52.978 | A10 | (ACT)10 | TCACTCTACAACCCTGTTTCA | TCTTTCTCTTCTTCATCCTCC | 55.82 | 55.23 | 206 |
|               |           |        |     |         |                       |                       |       |       |     |
| BoGMS189<br>7 | 23459492  | 35.982 | C1  | (AG)8   | AAGGAGGACGATCAGCTAA   | CCCTCTCTCTCTCTCTTAG   | 60.97 | 59.97 | 205 |
|               |           |        |     |         | ACC                   | GG                    |       |       |     |
| BnGMS027<br>1 | 73676463  | 48.769 | C1  | (AG)25  | ATGTTTCTCCATTTGTCCTG  | GTTGTGTGTTCTGGGAGAAT  | 55.03 | 54.91 | 304 |
|               |           |        |     |         |                       |                       |       |       |     |
| BoGMS156<br>5 | 26729121  | 72.051 | C1  | (AG)13  | GATGACTTGGCGTTGATT    | CTGAGAGAGAAGAAGGAG    | 54.31 | 54.79 | 217 |
|               |           |        |     |         |                       | AAGA                  |       |       |     |
| BnEMS028<br>7 | >CD825965 | 0      | C2  | (AAG)9  | TCATTTCTACGGAGGAGTTG  | GGAGGAGAAGAATCTAGG    | 55.38 | 55.01 | 157 |
|               |           |        |     |         |                       | GA                    |       |       |     |

|               |                  |             |    |         |                                               |                                   |       |       |     |
|---------------|------------------|-------------|----|---------|-----------------------------------------------|-----------------------------------|-------|-------|-----|
| BnEMS069<br>4 | >CD837521        | 66.823      | C2 | (AG)10  | AGATTTCTTCCCATCTCCAT                          | AAGCAGAAACCCACTAGAC<br>A          | 55.12 | 55.02 | 160 |
| BnGMS096<br>6 | 206705708        | 72.359      | C2 | (AG)7   | ACAAAGTCGATTGATCGAGGCTCCATCGGTGGTGTCTTAA<br>A | A                                 | 59.69 | 59.98 | 226 |
| BoGMS203<br>0 | 26726447         | 100.35<br>4 | C2 | (AT)8   | AACACTAGCCAAGGGTTTGT                          | AAGCAAATGAACCATCCAC<br>TCT        | 57.88 | 60.00 | 241 |
| BnEMS111<br>9 | >TA8116_3<br>708 | 114.63<br>2 | C2 | (ACT)6  | ACTGGAGTTTCAATTGGATG                          | CATCATCTTCAGCACTAGC<br>A          | 55.03 | 55.01 | 209 |
| BoGMS174<br>0 | 17816077         | 52.439      | C3 | (AG)8   | CTTCCGTGGATGATGTCTTGT                         | AACAATGGTCGTGAAAGGG<br>TAT        | 59.98 | 59.64 | 205 |
| BoGMS243<br>1 | 26724695         | 77.069      | C3 | (AT)9   | CAACCACCGACTCAAATAC                           | GCACCTGCAATCTCCATAC<br>AGA<br>ATA | 60.03 | 59.99 | 211 |
| BnGMS077<br>1 | 237766573        | 78.209      | C3 | (AAG)9  | GTGATTTGGGATCAAAGACG                          | GACGTCGCGAAACTTCTAA<br>A<br>TG    | 59.92 | 59.90 | 242 |
| BoGMS193<br>7 | 23580269         | 134.23      | C3 | (AG)8   | TCTCTAAACCGCAGGAAATC                          | GAATGTTTGATGGAACCAA<br>AT<br>AGG  | 60.10 | 60.57 | 200 |
| BnGMS000<br>2 | 73681210         | 135.96<br>1 | C3 | (AAT)12 | TTCACATGTTTGTCTCAACG                          | TACCATTCTTAAGGTGCCTA              | 55.56 | 54.94 | 236 |
| BoGMS057<br>3 | 23431962         | 11.949      | C4 | (AT)21  | TTTGAGGTATTGTAGCAGAT                          | AGCATTTGTAGTTGAGGAC<br>T<br>AG    | 51.86 | 54.63 | 347 |
| BoGMS231<br>9 | 23424309         | 31.46       | C4 | (AG)9   | ACTGGTGCGGAATGAATAG                           | CTTTGGTGATGCCACGATA<br>AAG<br>GTA | 60.50 | 60.02 | 165 |
| BoGMS176<br>4 | 17848905         | 35.874      | C4 | (AT)8   | TTGGAGCATCACGAAACTAC                          | TGCAACGTTATCACGCTTCT<br>AC<br>AT  | 60.18 | 59.81 | 189 |
| BoGMS083<br>6 | 18718578         | 42.616      | C4 | (AT)16  | CATAAACACACCGAACAAG                           | ACGCAATGACACACATACA<br>AC<br>C    | 55.68 | 55.25 | 146 |
| BoGMS133<br>0 | 23667519         | 0           | C5 | (AG)13  | AGGAGAAGAAGGAAGATAC                           | AGAAAGGAAAGAAAGACC<br>CA<br>AGA   | 54.71 | 54.92 | 184 |
| BoGMS222<br>8 | 17832873         | 8.467       | C5 | (AG)9   | CGTCGTCAGTCTCTCTCC                            | GTTCTTCCTTGGATTCTTC<br>T<br>AA    | 60.21 | 59.57 | 204 |
| BnGMS080<br>8 | 237768182        | 57.181      | C5 | (ATTG)4 | CTCGTGAGAAAACTGTGAT                           | CATGTCCCTGGAGCTCTTGT<br>GC        | 59.92 | 60.26 | 221 |
| BoGMS206<br>4 | 27005803         | 70.188      | C5 | (AG)8   | ATTTGACCCACCGAAAGTA                           | CATCGGACGGGTCAGATAT<br>TT<br>T    | 60.92 | 59.77 | 229 |
| BnGMS100<br>4 | 206713426        | 72.238      | C5 | (AT)7   | ATGTATCTCAGCAGCCCACA                          | CAATCACAACAGACGTACA<br>A<br>TGC   | 60.67 | 59.13 | 248 |

|               |           |             |    |         |                                                  |                            |       |       |     |
|---------------|-----------|-------------|----|---------|--------------------------------------------------|----------------------------|-------|-------|-----|
| BoGMS174<br>7 | 17824627  | 19.102      | C6 | (AG)8   | TGTTATCGGAACCCTCTTGA<br>AT                       | ATATAATTGACCCGTGCGT<br>AGC | 59.83 | 60.25 | 202 |
| BrGMS2901     | 199579978 | 30.063      | C6 | (ACT)11 | TTTATTACGACTGCCACCAA<br>GA                       | CAGATGCAGGAATAGTGAC<br>GTT | 59.65 | 59.27 | 228 |
| BnGMS035<br>3 | 73676544  | 40.093      | C6 | (AT)14  | AACCAAAGAATACATCCGA<br>A                         | TTGCAGAAGTTGAGACAAT<br>G   | 54.73 | 54.89 | 299 |
| BnGMS096<br>8 | 206713912 | 63.2        | C6 | (AG)7   | TACATGGCAAAGAACCTCGT<br>C                        | AAGTCTCAGGAAGCACGTC<br>AA  | 60.13 | 60.04 | 252 |
| BoGMS353<br>8 | 23631504  | 100.35<br>5 | C6 | (ACT)7  | TTCACCGTCCTCTTCAGTATC<br>A                       | AGGAGAATCGTCAGAATCA<br>AGC | 59.73 | 59.85 | 212 |
| BoGMS045<br>4 | 18731031  | 16.082      | C7 | (AG)25  | GCACTGAGAGAGAAAGAGT<br>CA                        | TGTTGTATGGCAAGTATGTG<br>T  | 54.84 | 54.06 | 202 |
| BnGMS074<br>9 | 206717057 | 21.968      | C7 | (AAT)23 | CGGTCTAGTTACCCAGATCA<br>CC                       | AATCCCCTTGCCACTTATCA<br>T  | 59.89 | 59.68 | 277 |
| BoGMS249<br>9 | 17628525  | 74.688      | C7 | (AG)10  | TATACGATTGCTCTCCCTCCT<br>C                       | TCGTACAGGTGAATTACGC<br>AAG | 59.71 | 60.19 | 213 |
| BnGMS038<br>6 | 73676707  | 86.081      | C7 | (AT)12  | TTGGCTCATCAATGACAATA<br>ACAATGTGGTAAACACGAA<br>A |                            | 55.04 | 54.01 | 220 |
| BoGMS209<br>5 | 33777290  | 96.37       | C7 | (AT)8   | CCATGCTGGTAGGCAATAAG<br>TA                       | TGGACCATGGGACCATAGT<br>AGT | 59.17 | 60.50 | 214 |
| BrGMS4450     | 255983240 | 21.592      | C8 | (AG)9   | CTCAGGTTCTGTTCAACCAA<br>CA                       | CAACAGGAAATGCGATGTG<br>TAT | 60.19 | 59.89 | 203 |
| BnEMS002<br>0 | 65288181  | 34.225      | C8 | (ACT)12 | CTCTATCCGAAGTGAATGAT<br>G                        | GTCGTCAACCCACACAAA         | 54.90 | 56.16 | 234 |
| BnGMS050<br>9 | 75681768  | 74.308      | C8 | (AG)9   | TGAATGTGCTTCTTCGTATG<br>TTCAAGCTCGTTCACTCTCT     |                            | 54.86 | 55.31 | 203 |
| BnGMS033<br>6 | 73682775  | 92.809      | C8 | (AT)15  | ACCGAATAACAAGTCGAAC<br>A                         | TTGAAACACACCCATTTAC<br>A   | 55.75 | 54.87 | 345 |
| BoGMS279<br>1 | 18831180  | 113.89<br>9 | C8 | (AT)11  | ACCGATTTCTACCCGACTTA<br>AA                       | TGACATACCAACTCCCATC<br>AAA | 59.06 | 60.23 | 286 |
| BoGMS360<br>8 | 18826017  | 10.69       | C9 | (AAG)8  | TTAGAGCGATAGGGCTTAAC<br>GA                       | ACACAAGCTCAACCGAGAA<br>GAT | 60.35 | 60.31 | 190 |
| BnEMS000<br>8 | 56842972  | 22.2        | C9 | (AG)24  | TTCTCTCCATCTCTTTCCA<br>ATGAATCGTGTGCGTGAGT       |                            | 54.94 | 57.59 | 179 |
| BnEMS000<br>6 | 65290143  | 24.832      | C9 | (AG)25  | CATCTCCTCTGTCTTTATCCT<br>T                       | GAATCGTGTTTCGTGAGTGA       | 54.34 | 55.44 | 122 |

|          |          |        |    |        |                      |                      |       |       |     |
|----------|----------|--------|----|--------|----------------------|----------------------|-------|-------|-----|
| BoGMS128 | 17705762 | 50.978 | C9 | (AT)13 | GTGAAGCAAGGCATAAATA  | GTAGAAACAGGTCCAACCA  | 54.86 | 55.12 | 144 |
| 7        |          |        |    |        | AA                   | A                    |       |       |     |
| BoGMS247 | 33801054 | 79.929 | C9 | (AT)9  | TCTGTACAGTGCCGTGTCAA | TGACTCTTACATCAATCACG | 60.61 | 60.06 | 206 |
| 7        |          |        |    |        | AT                   | GTCT                 |       |       |     |

---

White - markers showing no polymorphism and discarded after preliminary analyzes .

Grey/ blue - markers that demonstrated polymorphism in parental lines, used for analyzing all the genotypes.

Blue - markers associated with trait/ heterosis effect with the same allele recurring and having the same sign of estimation in both years.

---

**Table S2.** Characteristics of 43 polymorphic SSR markers.

| Marker    | Linkage group | Expected product size | Obtained product sizes | Number of alleles | PIC   |
|-----------|---------------|-----------------------|------------------------|-------------------|-------|
| BrEMS0015 | A1            | 384                   | 372 - 410              | 6                 | 1.000 |
| BrGMS4031 | A1            | 200                   | 209 - 219              | 2                 | 0.898 |
| BrGMS2431 | A1            | 203                   | 217 - 219              | 2                 | 0.898 |
| BnGMS0103 | A2            | 207                   | 216 - 220              | 2                 | 0.814 |
| BrGMS1490 | A3            | 384                   | 300 - 404              | 4                 | 0.998 |
| BrGMS3041 | A3            | 178                   | 191 - 193              | 2                 | 0.882 |
| BrGMS4057 | A3            | 189                   | 201 - 209              | 3                 | 0.994 |
| BrGMS2252 | A5            | 200                   | 206 - 219              | 2                 | 0.630 |
| BrGMS4110 | A5            | 139                   | 170 - 179              | 5                 | 0.972 |
| BrGMS1804 | A5            | 305                   | 324 - 350              | 3                 | 0.602 |
| BnGMS0662 | A5            | 205                   | 217 - 221              | 3                 | 1.000 |
| BrGMS3653 | A6            | 156                   | 160 - 162              | 2                 | 0.886 |
| BrGMS2989 | A7            | 196                   | 205 - 207              | 2                 | 0.946 |
| BrGMS3837 | A7            | 298                   | 313 - 332              | 2                 | 0.982 |
| BnEMS0525 | A7            | 165                   | 181 - 182              | 2                 | 0.890 |
| BnGMS0373 | A8            | 279                   | 290 - 296              | 2                 | 0.830 |
| BrGMS2025 | A8            | 108                   | 122 - 125              | 2                 | 0.786 |
| BrGMS4252 | A9            | 286                   | 288 - 292              | 3                 | 0.996 |
| BnGMS0713 | A9            | 173                   | 182 - 188              | 4                 | 0.886 |
| BrGMS3688 | A10           | 173                   | 261 - 265              | 2                 | 0.898 |
| BrGMS1218 | A10           | 260                   | 295 - 315              | 2                 | 0.994 |
| BrGMS0086 | A10           | 314                   | 313 - 317              | 2                 | 0.882 |
| BoGMS1897 | C1            | 205                   | 215 - 219              | 3                 | 0.912 |
| BoGMS1565 | C1            | 217                   | 220 - 253              | 3                 | 0.988 |
| BnEMS0694 | C2            | 160                   | 170 - 172              | 2                 | 0.824 |
| BnEMS1119 | C2            | 209                   | 224 - 233              | 3                 | 0.836 |
| BoGMS1740 | C3            | 205                   | 226 - 511              | 4                 | 0.842 |
| BnGMS0771 | C3            | 242                   | 259 - 266              | 2                 | 0.820 |
| BoGMS0573 | C4            | 347                   | 351 - 359              | 4                 | 0.904 |
| BoGMS2319 | C4            | 165                   | 170 - 191              | 3                 | 0.984 |
| BoGMS1764 | C4            | 189                   | 203 - 209              | 2                 | 0.894 |
| BrGMS2901 | C6            | 228                   | 234 - 277              | 3                 | 0.964 |
| BnGMS0353 | C6            | 299                   | 313 - 315              | 2                 | 0.802 |
| BoGMS3538 | C6            | 212                   | 224 - 227              | 2                 | 0.894 |
| BoGMS0454 | C7            | 202                   | 232 - 236              | 3                 | 0.920 |
| BnGMS0749 | C7            | 277                   | 283 - 303              | 2                 | 0.898 |
| BoGMS2499 | C7            | 213                   | 209 - 228              | 2                 | 0.946 |
| BnGMS0386 | C7            | 220                   | 229 - 235              | 2                 | 0.986 |
| BnEMS0020 | C8            | 234                   | 345 - 357              | 2                 | 0.880 |
| BnGMS0509 | C8            | 203                   | 215 - 227              | 2                 | 0.934 |
| BnGMS0336 | C8            | 345                   | 351 - 366              | 4                 | 0.910 |
| BoGMS2791 | C8            | 286                   | 294 - 304              | 3                 | 0.864 |
| BoGMS3608 | C9            | 190                   | 183 - 202              | 3                 | 0.938 |

**Table S3.** Markers associated with observed traits in 2015 and 2016. Highlighted traits repeat the association in both years of study.

Traits: BoF – beginning of flowering, LoF – length of flowering, PH – plant height, BPP – no. of branches per plant, SPP – no. of siliques per plant, SL – silique length, SPS – no. of seeds per silique, TSW – thousand seed weight, N/A – not associated.

| Marker    | 2015                   | 2016                         |
|-----------|------------------------|------------------------------|
| BrEMS0015 | BoF, LoF, SL, TSW      | BoF, LoF, PH, BPP, SPP       |
| BrGMS4031 | BoF, LoF, TSW          | SPP                          |
| BrGMS2431 | BoF, LoF, TSW          | SPP                          |
| BnGMS0103 | LoF                    | SPP                          |
| BrGMS1490 | LoF                    | BoF, LoF, PH, BPP, SPP, SPS  |
| BrGMS3041 | BoF, LoF               | BoF, LoF, SPP                |
| BrGMS4057 | BoF, LoF, SL           | BoF, LoF, PH, SPP            |
| BrGMS2252 | BoF, LoF, TSW          | SPP                          |
| BrGMS4110 | LoF                    | BoF, LoF, BPP, SPP, SPS      |
| BrGMS1804 | LoF, SL, SPS, TSW      | BoF, LoF, BPP, SPP, TSW      |
| BnGMS0662 | LoF, SL                | BoF, LoF, SPP                |
| BrGMS3653 | BoF, LoF, SPS, TSW     | SPP, TSW                     |
| BrGMS2989 | LoF                    | BoF, LoF, BPP, SPP, TSW      |
| BrGMS3837 | BoF, LoF, PH           | BoF, LoF, PH, BPP, SPP, TSW  |
| BnEMS0525 | LoF                    | SPP                          |
| BnGMS0373 | SPS                    | PH, SPP, TSW                 |
| BrGMS2025 | LoF                    | BoF, LoF, PH, BPP, SPP       |
| BrGMS4252 | BoF, LoF, BPP, TSW     | SPP                          |
| BnGMS0713 | BoF, LoF, TSW          | BoF, LoF, PH, BPP, SPP, SPS  |
| BrGMS3688 | LoF                    | BoF, LoF, SPP                |
| BrGMS1218 | BoF, LoF, SPS, TSW     | -                            |
| BrGMS0086 | LoF, BPP, SPS, TSW     | BoF, LoF, BPP, SPP, SPS, TSW |
| BoGMS1897 | -                      | BoF, LoF, SPP, SPS           |
| BoGMS1565 | BoF, LoF, TSW          | BoF, LoF, PH, BPP, SL, SPS   |
| BnEMS0694 | LoF, SL, TSW           | BoF, LoF, PH, BPP, SPP       |
| BnEMS1119 | BoF, PH, SL            | PH, SPS                      |
| BoGMS1740 | BoF, LoF, SL, SPS, TSW | BoF, LoF, PH, BPP, SPP, TSW  |
| BnGMS0771 | LoF, SPS               | BPP, SPP, SPS                |
| BoGMS0573 | BoF, LoF               | BoF, LoF, PH, TSW            |
| BoGMS2319 | BoF, LoF, SPS, TSW     | SPP                          |
| BoGMS1764 | BoF, LoF, TSW          | SPP                          |
| BrGMS2901 | BoF, LoF, PH, SL, TSW  | BoF, LoF, PH, BPP, SPP       |
| BnGMS0353 | BoF, LoF, SPS, TSW     | BoF, LoF, PH, BPP, SPP       |
| BoGMS3538 | BoF, LoF, TSW          | SPP                          |
| BoGMS0454 | BoF, PH, SPS           | PH, BPP, SPP, SPS            |
| BnGMS0749 | BoF, LoF, TSW          | SPP                          |
| BoGMS2499 | LoF                    | BoF, LoF, BPP, SPP, TSW      |
| BnGMS0386 | PH, SL                 | PH, BPP, TSW                 |
| BnEMS0020 | BoF, LoF, SPS, TSW     | SPP, SPS, TSW                |



|           |                        |                             |
|-----------|------------------------|-----------------------------|
| BnGMS0509 | BoF, LoF, PH, SPP, TSW | BoF, LoF, PH, BPP, SPP, TSW |
| BnGMS0336 | LoF, PH                | BoF, LoF, SPP, TSW          |
| BoGMS2791 | LoF                    | BoF, LoF, SPP, TSW          |
| BoGMS3608 | LoF, PH, SPS, TSW      | -                           |

**Table S4.** Characteristics of SSR markers significantly associated with studied quantitative traits. Highlighted markers have effects with the same signs in both years of field trials and were chosen for detailed analyses. Effect – estimates of regression coefficients, % – The percentage of total phenotypic variance explained by markers, PIC – polymorphic information content, BoF – beginning of flowering, LoF – length of flowering, PH – plant height, BPP – no. of branches per plant, SPP – no. of siliques per plant, SPS – no. of seeds per silique, TSW – thousand seed weight.

| Trait | Marker    | 2015   |        |                 |     | 2016   |        |                 |      |
|-------|-----------|--------|--------|-----------------|-----|--------|--------|-----------------|------|
|       |           | Allele | Effect | <i>p</i> -value | %   | Allele | Effect | <i>p</i> -value | %    |
| BoF   | BrEMS0015 | 372    | 0.85   | 0.032           | 2.0 | 372    | -0.77  | 0.04            | 1.8  |
|       |           | 408    | 1.07   | 0.008           | 3.3 | -      | -      | -               | -    |
|       | BrGMS3041 | 191    | 0.78   | 0.050           | 1.6 | -      | -      | -               | -    |
|       |           | -      | -      | -               | -   | 193    | 3.52   | 0.012           | 2.9  |
|       | BrGMS3837 | -      | -      | -               | -   | 313    | -1.46  | 0.015           | 2.7  |
|       |           | 332    | -1.14  | 0.012           | 2.9 | -      | -      | -               | -    |
|       | BoGMS1565 | -      | -      | -               | -   | 220    | -2.47  | 0.024           | 2.3  |
|       |           | -      | -      | -               | -   | 233    | 10.52  | <.001           | 9.9  |
|       | BoGMS1740 | 253    | -1.25  | 0.002           | 4.5 | -      | -      | -               | -    |
|       |           | 237    | 1.18   | 0.002           | 4.6 | -      | -      | -               | -    |
|       | BoGMS0573 | -      | -      | -               | -   | 511    | -1.65  | <.001           | 10.1 |
|       |           | 353    | 3.69   | 0.043           | 1.7 | -      | -      | -               | -    |
|       | BrGMS2901 | -      | -      | -               | -   | 357    | -0.77  | 0.046           | 1.6  |
|       |           | 234    | 0.99   | 0.010           | 3.0 | 234    | -0.86  | 0.017           | 2.6  |
|       | BnGMS0353 | 277    | 0.80   | 0.044           | 1.7 | -      | -      | -               | -    |
|       |           | 315    | 0.96   | 0.017           | 2.6 | 315    | -1.63  | <.001           | 9.8  |
|       | BrGMS4057 | 201    | 0.80   | 0.041           | 1.8 | -      | -      | -               | -    |
|       |           | -      | -      | -               | -   | 207    | -1.12  | 0.002           | 4.9  |
|       | BnGMS0713 | -      | -      | -               | -   | 182    | 0.96   | 0.007           | 3.4  |
|       |           | -      | -      | -               | -   | 184    | -0.97  | 0.007           | 3.5  |
|       | BnGMS0509 | 188    | 1.02   | 0.011           | 3.0 | -      | -      | -               | -    |
|       |           | 215    | 1.08   | 0.048           | 1.6 | 215    | -1.03  | 0.043           | 1.7  |
|       |           | 227    | -1.40  | <.001           | 6.6 | -      | -      | -               | -    |
| LoF   | BrEMS0015 | 372    | -0.85  | <.001           | 8.2 | 372    | 0.76   | 0.041           | 1.8  |
|       |           | 400    | -0.55  | 0.007           | 3.5 | -      | -      | -               | -    |
|       |           | 408    | -0.92  | <.001           | 9.4 | -      | -      | -               | -    |
|       | BnGMS0103 | 216    | -0.63  | 0.002           | 4.6 | 216    | 1.22   | <.001           | 5.8  |
|       | BrGMS1490 | 400    | -0.65  | 0.016           | 2.6 | -      | -      | -               | -    |
|       |           | 404    | 0.96   | <.001           | 5.4 | 404    | -1.17  | 0.022           | 2.3  |
|       | BrGMS3041 | 191    | -0.90  | <.001           | 9.3 | -      | -      | -               | -    |
|       |           | -      | -      | -               | -   | 193    | -3.52  | 0.012           | 2.9  |

|    |           |     |       |       |      |     |        |       |      |
|----|-----------|-----|-------|-------|------|-----|--------|-------|------|
|    |           | 201 | -0.94 | <.001 | 10.4 | -   | -      | -     | -    |
|    | BrGMS4057 | 207 | -0.55 | 0.008 | 3.3  | 207 | 1.12   | 0.002 | 4.9  |
|    |           | 209 | 0.71  | 0.003 | 4.3  | -   | -      | -     | -    |
|    | BrGMS4110 | 170 | -0.74 | 0.003 | 4.3  | -   | -      | -     | -    |
|    |           | -   | -     | -     | -    | 188 | 1.47   | <.001 | 8.0  |
|    | BrGMS1804 | 348 | 0.60  | 0.013 | 2.9  | -   | -      | -     | -    |
|    |           | 350 | -1.20 | <.001 | 15.9 | 350 | 1.81   | <.001 | 11.7 |
|    | BnGMS0662 | 217 | -0.49 | 0.017 | 2.6  | 217 | 1.10   | 0.002 | 4.6  |
|    |           | 219 | -0.46 | 0.022 | 2.3  | -   | -      | -     | -    |
|    | BrGMS2989 | 207 | -0.96 | <.001 | 6.4  | 207 | 1.58   | <.001 | 5.7  |
|    | BrGMS3837 | 313 | -1.11 | 0.001 | 5.3  | 313 | 1.46   | 0.015 | 2.7  |
|    |           | 332 | 0.59  | 0.016 | 2.7  | -   | -      | -     | -    |
|    | BrGMS3688 | -   | -     | -     | -    | 261 | 1.27   | 0.01  | 3.1  |
|    |           | 265 | -0.58 | 0.005 | 3.9  | -   | -      | -     | -    |
|    |           | -   | -     | -     | -    | 220 | 2.46   | 0.025 | 2.2  |
|    | BoGMS1565 | -   | -     | -     | -    | 233 | -10.50 | <.001 | 9.9  |
|    |           | 253 | 0.67  | 0.003 | 4.4  | -   | -      | -     | -    |
|    | BrGMS2025 | 125 | -0.62 | 0.003 | 4.4  | 125 | 1.16   | 0.001 | 5.2  |
|    |           | 182 | 0.42  | 0.042 | 1.7  | 182 | -0.96  | 0.007 | 3.4  |
|    | BnGMS0713 | 184 | -0.40 | 0.050 | 1.6  | 184 | 0.98   | 0.006 | 3.5  |
|    |           | 188 | -0.92 | <.001 | 9.4  | -   | -      | -     | -    |
|    | BrGMS0086 | 313 | -0.84 | <.001 | 8.5  | 313 | 0.83   | 0.023 | 2.3  |
|    | BnEMS0694 | 172 | -1.03 | <.001 | 10.8 | 172 | 1.67   | <.001 | 9.1  |
|    |           | 226 | 0.64  | 0.009 | 3.2  | -   | -      | -     | -    |
|    | BoGMS1740 | 237 | -0.66 | 0.001 | 5.0  | -   | -      | -     | -    |
|    |           | 511 | -1.15 | <.001 | 15.2 | 511 | 1.65   | <.001 | 10.1 |
|    | BoGMS0573 | 357 | -0.49 | 0.026 | 2.2  | 357 | 0.77   | 0.046 | 1.7  |
|    | BrGMS2901 | 234 | -0.92 | <.001 | 10.4 | 234 | 0.85   | 0.018 | 2.5  |
|    |           | 237 | 0.67  | 0.016 | 2.6  | -   | -      | -     | -    |
|    | BnGMS0353 | 315 | -1.02 | <.001 | 11.9 | 315 | 1.64   | <.001 | 9.8  |
|    | BoGMS2499 | 209 | -0.99 | <.001 | 8.0  | 209 | 1.28   | 0.003 | 4.1  |
|    | BnGMS0509 | 215 | -1.14 | <.001 | 7.8  | 215 | 1.03   | 0.043 | 1.7  |
|    |           | 227 | 0.54  | 0.009 | 3.2  | -   | -      | -     | -    |
|    | BnGMS0336 | 362 | -1.15 | <.001 | 12.9 | 362 | 1.75   | <.001 | 9.7  |
|    |           | 366 | 1.15  | 0.044 | 1.7  | -   | -      | -     | -    |
|    | BoGMS2791 | 294 | -1.03 | <.001 | 10.4 | 294 | 1.24   | 0.002 | 4.6  |
| PH | BrGMS3837 | 313 | 5.03  | 0.033 | 1.9  | 313 | 6.92   | 0.003 | 4.3  |
|    |           | 332 | -3.56 | 0.035 | 1.9  | -   | -      | -     | -    |
|    | BnEMS1119 | 224 | 4.09  | 0.040 | 1.8  | 224 | 4.42   | 0.023 | 2.3  |
|    | BrGMS2901 | 277 | 3.67  | 0.012 | 2.9  | 277 | 2.82   | 0.050 | 1.6  |
|    |           | 232 | -6.46 | <.001 | 8.3  | 232 | -5.41  | <.001 | 5.9  |
|    | BoGMS0454 | -   | -     | -     | -    | 234 | 2.96   | 0.036 | 1.9  |
|    | BnGMS0386 | 229 | 4.72  | 0.014 | 2.8  | 229 | 5.69   | 0.003 | 4.4  |
|    | BnGMS0509 | -   | -     | -     | -    | 215 | 6.76   | <.001 | 5.9  |

|            |           |     |        |       |     |     |       |       |     |
|------------|-----------|-----|--------|-------|-----|-----|-------|-------|-----|
|            |           | 227 | -4.18  | 0.004 | 4.1 | -   | -     | -     | -   |
| <b>BPP</b> | BrGMS0086 | 313 | -0.46  | 0.033 | 2.0 | 313 | -0.41 | 0.033 | 1.9 |
| <b>SPP</b> | BnGMS0509 | -   | -      | -     | -   | 215 | -55.4 | 0.032 | 2.0 |
|            |           | 227 | -32.40 | 0.040 | 1.8 | -   | -     | -     | -   |
| <b>SPS</b> | BrGMS0086 | 313 | 0.74   | 0.036 | 1.9 | -   | -     | -     | -   |
|            |           | 317 | -1.65  | 0.023 | 2.3 | 317 | -2.13 | 0.002 | 4.9 |
|            | BnGMS0771 | 259 | -0.85  | 0.028 | 2.1 | -   | -     | -     | -   |
|            |           | -   | -      | -     | -   | 266 | 0.74  | 0.037 | 1.9 |
|            | BoGMS0454 | 232 | -1.26  | 0.001 | 5.0 | 232 | -0.83 | 0.024 | 2.2 |
|            |           | 234 | 0.71   | 0.046 | 1.7 | -   | -     | -     | -   |
|            | BnEMS0020 | 345 | 0.70   | 0.049 | 1.6 | -   | -     | -     | -   |
|            |           | -   | -      | -     | -   | 357 | -1.71 | 0.030 | 2.1 |
| <b>TSW</b> | BrGMS1804 | 348 | 0.12   | 0.028 | 2.1 | -   | -     | -     | -   |
|            |           | -   | -      | -     | -   | 350 | 0.14  | 0.025 | 2.2 |
|            | BrGMS3653 | 160 | -0.15  | 0.002 | 4.6 | -   | -     | -     | -   |
|            |           | -   | -      | -     | -   | 162 | 0.36  | 0.010 | 3.1 |
|            | BrGMS0086 | 313 | -0.11  | 0.018 | 2.5 | -   | -     | -     | -   |
|            |           | -   | -      | -     | -   | 317 | 0.32  | 0.007 | 3.4 |
|            |           | 237 | -0.17  | <.001 | 6.3 | -   | -     | -     | -   |
|            | BoGMS1740 | 241 | 0.29   | 0.005 | 3.7 | 241 | 0.26  | 0.038 | 1.8 |
|            |           | 511 | -0.12  | 0.019 | 2.5 | 511 | 0.17  | 0.005 | 3.7 |
|            | BnEMS0020 | 345 | -0.13  | 0.009 | 3.2 | -   | -     | -     | -   |
|            |           | -   | -      | -     | -   | 357 | 0.35  | 0.013 | 2.8 |
|            | BnGMS0509 | 227 | 0.10   | 0.033 | 2.0 | 227 | 0.12  | 0.038 | 1.8 |

**Table S5.** Markers associated with heterosis effect in 2015 and 2016. Highlighted traits repeat the association in both years of study.

Traits: PH – plant height, BPP – no. of branches per plant, SPP – no. of siliques per plant, SL – silique length, SPS – no. of seeds per silique, TSW – thousand seed weight, N/A – not associated.

| Marker    | CMS×DH       |          | CMS/DH×Rfo   |              |
|-----------|--------------|----------|--------------|--------------|
|           | 2015         | 2016     | 2015         | 2016         |
| BrEMS0015 | TSW          | PH, TSW  | SPP, SPS     | SL           |
| BrGMS4031 | -            | -        | -            | SL           |
| BrGMS2431 | -            | -        | -            | SL           |
| BnGMS0103 | -            | -        | -            | -            |
| BrGMS1490 | SPS          | SL, SPS  | SPS          | PH           |
| BrGMS3041 | -            | PH, SPS  | -            | -            |
| BrGMS4057 | SPS          | SPS      | BPP, SPP     | PH           |
| BrGMS2252 | SPP, SL, SPS | SL, SPS  | PH, SPS      | PH           |
| BrGMS4110 | SL           | SL, SPS  | -            | -            |
| BrGMS1804 | -            | SPS      | PH           | -            |
| BnGMS0662 | SL           | SPS      | BPP, SPP, SL | SL, SPS, TSW |
| BrGMS3653 | SL           | SPP, SPS | SPP, SL      | -            |
| BrGMS2989 | -            | SPP, SPS | -            | -            |

|           |         |                   |             |              |
|-----------|---------|-------------------|-------------|--------------|
| BrGMS3837 | -       | SL                | -           | -            |
| BnEMS0525 | -       | -                 | -           | SPS          |
| BnGMS0373 | SL, SPS | BPP, SPP, TSW     | -           | -            |
| BrGMS2025 | -       | PH                | PH          | -            |
| BrGMS4252 | SPS     | SL, SPS           | -           | TSW          |
| BnGMS0713 | -       | SL, SPS           | -           | SPS          |
| BrGMS3688 | SPS     | SL, SPS           | SPS, TSW    | PH, SL       |
| BrGMS1218 | SL      | -                 | -           | PH           |
| BrGMS0086 | SPS     | SL, SPS           | -           | -            |
| BoGMS1897 | PH, SPS | PH, SPS           | -           | -            |
| BoGMS1565 | -       | PH, TSW           | -           | -            |
| BnEMS0694 | SL, SPS | -                 | -           | -            |
| BnEMS1119 | -       | -                 | PH          | -            |
| BoGMS1740 | BPP, SL | SPS               | PH, BPP, SL | PH, BPP, TSW |
| BnGMS0771 | SPS     | -                 | -           | -            |
| BoGMS0573 | SL      | -                 | -           | TSW          |
| BoGMS2319 | SL      | -                 | -           | -            |
| BoGMS1764 | -       | -                 | -           | -            |
| BrGMS2901 | SPS     | SPP, SL, SPS      | SPP, SL     | -            |
| BnGMS0353 | SL      | -                 | BPP, SPP    | -            |
| BoGMS3538 | -       | -                 | -           | TSW          |
| BoGMS0454 | -       | -                 | -           | -            |
| BnGMS0749 | SPS     | SL, SPS           | -           | -            |
| BoGMS2499 | -       | -                 | -           | -            |
| BnGMS0386 | SL      | PH                | -           | -            |
| BnEMS0020 | PH      | TSW               | -           | -            |
| BnGMS0509 | SPS     | BPP, SPP          | -           | -            |
| BnGMS0336 | SL      | BPP, SL, SPS, TSW | SL, SPS     | -            |
| BoGMS2791 | PH      | TSW               | -           | -            |
| BoGMS3608 | -       | -                 | PH          | SL, SPS      |

**Table S6.** Characteristics of SSR markers associated with heterosis effect for phenotypic traits in CMS×DH hybrids. Highlighted markers have effects with the same signs in both years of field trials and were chosen for detailed analyses.

Effect – estimates of regression coefficients, % – The percentage of total phenotypic variance explained by markers, PIC – polymorphic information content, PH – plant height, BPP – no. of branches per plant, SPP – no. of siliques per plant, SL – silique length, SPS – no. of seeds per silique, TSW – thousand seed weight.

| Trait | Marker    | 2015   |        |                 |     | 2016   |        |                 |      |
|-------|-----------|--------|--------|-----------------|-----|--------|--------|-----------------|------|
|       |           | Allele | Effect | <i>p</i> -value | %   | Allele | Effect | <i>p</i> -value | %    |
| PH    | BrEMS0015 | -      | -      | -               | -   | 372    | -10.45 | 0.001           | 15.0 |
|       | BrGMS3041 | -      | -      | -               | -   | 191    | -6.80  | 0.042           | 5.4  |
|       | BoGMS1565 | -      | -      | -               | -   | 220    | -10.69 | <.001           | 15.8 |
|       | BoGMS2719 | 294    | -9.91  | 0.044           | 5.2 | -      | -      | -               | -    |
|       | BrGMS2025 | -      | -      | -               | -   | 125    | -6.27  | 0.016           | 8.0  |

|            |           |     |        |       |      |     |        |       |      |
|------------|-----------|-----|--------|-------|------|-----|--------|-------|------|
|            | BoGMS1897 | 219 | -5.28  | 0.036 | 5.7  | 219 | -5.91  | 0.043 | 5.3  |
|            | BnGMS0386 | -   | -      | -     | -    | 229 | 3.13   | 0.046 | 5.1  |
|            | BnEMS0020 | 357 | -9.91  | 0.044 | 5.2  | -   | -      | -     | -    |
| <b>BPP</b> | BnGMS0373 | -   | -      | -     | -    | 290 | -0.62  | 0.029 | 6.3  |
|            | BoGMS1740 | 511 | -1.66  | 0.013 | 8.7  | -   | -      | -     | -    |
|            | BnGMS0509 | -   | -      | -     | -    | 227 | 0.692  | 0.014 | 8.5  |
|            | BnGMS0336 | -   | -      | -     | -    | 364 | 0.70   | 0.027 | 6.5  |
| <b>SPP</b> | BrGMS3653 | -   | -      | -     | -    | 162 | -340.0 | 0.003 | 12.5 |
|            | BrGMS2989 | -   | -      | -     | -    | 207 | -231.7 | 0.005 | 11.2 |
|            | BnGMS0373 | -   | -      | -     | -    | 296 | 145.1  | 0.036 | 5.8  |
|            | BrGMS2252 | 219 | 119.7  | 0.035 | 5.8  | -   | -      | -     | -    |
|            | BrGMS2901 | -   | -      | -     | -    | 234 | -72.00 | 0.028 | 6.4  |
|            | BnGMS0509 | -   | -      | -     | -    | 227 | 78.00  | 0.009 | 9.6  |
| <b>SL</b>  | BrGMS1490 | -   | -      | -     | -    | 358 | -3.14  | 0.026 | 6.6  |
|            |           | 170 | 2.73   | 0.007 | 10.2 | -   | -      | -     | -    |
|            | BrGMS4110 | -   | -      | -     | -    | 176 | -5.36  | 0.006 | 10.9 |
|            |           | -   | -      | -     | -    | 179 | -5.36  | 0.006 | 10.9 |
|            | BrGMS3653 | 160 | -5.02  | 0.003 | 12.5 | -   | -      | -     | -    |
|            | BrGMS3837 | -   | -      | -     | -    | 332 | 1.52   | 0.049 | 4.9  |
|            | BnGMS0373 | 296 | 4.83   | 0.028 | 6.50 | -   | -      | -     | -    |
|            | BrGMS4252 | -   | -      | -     | -    | 290 | 6.75   | 0.014 | 8.4  |
|            |           | -   | -      | -     | -    | 292 | -3.70  | 0.003 | 12.5 |
|            | BrGMS1218 | 295 | -5.66  | 0.003 | 13.0 | -   | -      | -     | -    |
|            | BrGMS3688 | -   | -      | -     | -    | 261 | 6.75   | 0.014 | 8.4  |
|            | BrGMS0086 | -   | -      | -     | -    | 317 | 6.75   | 0.014 | 8.4  |
|            | BnEMS0694 | 170 | 3.38   | 0.011 | 9.0  | -   | -      | -     | -    |
|            | BoGMS1740 | 237 | -2.85  | 0.026 | 6.6  | -   | -      | -     | -    |
|            | BoGMS0573 | 351 | -10.56 | <.001 | 24.9 | -   | -      | -     | -    |
|            | BoGMS2319 | 170 | -10.56 | <.001 | 24.9 | -   | -      | -     | -    |
|            | BnGMS0353 | 313 | 5.78   | 0.008 | 10.0 | -   | -      | -     | -    |
|            | BrGMS2252 | 206 | -3.70  | 0.012 | 8.7  | 206 | -4.15  | <.001 | 22.4 |
|            | BnGMS0662 | 221 | 2.37   | 0.021 | 7.2  | -   | -      | -     | -    |
|            | BrGMS0713 | -   | -      | -     | -    | 184 | 3.72   | 0.001 | 15.2 |
|            |           | -   | -      | -     | -    | 186 | -3.70  | 0.003 | 12.5 |
|            | BrGMS2901 | -   | -      | -     | -    | 237 | 6.75   | 0.014 | 8.4  |
|            | BnGMS0749 | -   | -      | -     | -    | 303 | -6.75  | 0.014 | 8.4  |
|            | BnGMS0386 | 235 | 9.22   | <.001 | 28.1 | -   | -      | -     | -    |
|            | BrGMS0336 | -   | -      | -     | -    | 351 | -5.36  | 0.006 | 10.9 |
|            |           | 366 | -10.56 | <.001 | 24.9 | -   | -      | -     | -    |
| <b>SPS</b> | BrGMS1490 | 358 | -2.45  | 0.009 | 9.7  | 358 | -3.80  | <.001 | 25.4 |
|            | BrGMS3041 | -   | -      | -     | -    | 191 | -2.31  | 0.034 | 5.9  |
|            | BrGMS4110 | -   | -      | -     | -    | 176 | -3.81  | 0.003 | 12.4 |
|            |           | -   | -      | -     | -    | 179 | -3.81  | 0.003 | 12.4 |
|            | BrGMS1804 | -   | -      | -     | -    | 348 | 4.67   | <.001 | 19.5 |

|     |           |     |       |       |      |     |       |       |      |
|-----|-----------|-----|-------|-------|------|-----|-------|-------|------|
|     | BrGMS3653 | -   | -     | -     | -    | 160 | -2.10 | 0.014 | 8.4  |
|     | BrGMS2989 | -   | -     | -     | -    | 205 | 1.50  | 0.001 | 15.1 |
|     | BnGMS0373 | 290 | -1.33 | 0.005 | 11.5 | -   | -     | -     | -    |
|     | BrGMS4252 | 290 | 4.04  | 0.028 | 6.5  | 290 | 4.86  | 0.008 | 10.0 |
|     |           | -   | -     | -     | -    | 292 | -1.79 | 0.038 | 5.6  |
|     | BrGMS3688 | 261 | 4.04  | 0.028 | 6.5  | 261 | 4.86  | 0.008 | 10.0 |
|     | BrGMS0086 | 317 | 4.04  | 0.028 | 6.5  | 317 | 4.86  | 0.008 | 10.0 |
|     | BnEMS0694 | 170 | 1.99  | 0.002 | 13.8 | -   | -     | -     | -    |
|     | BoGMS1740 | -   | -     | -     | -    | 226 | 4.67  | <.001 | 19.5 |
|     | BnGMS0771 | 259 | 2.46  | 0.022 | 7.1  | -   | -     | -     | -    |
|     | BrGMS4057 | 209 | 2.37  | 0.012 | 9.0  | 209 | 3.39  | <.001 | 19.8 |
|     | BrGMS2252 | 206 | -1.89 | 0.009 | 9.6  | 206 | -1.96 | 0.007 | 10.2 |
|     | BnGMS0662 | -   | -     | -     | -    | 221 | 1.11  | 0.030 | 6.3  |
|     |           | -   | -     | -     | -    | 184 | 1.76  | 0.026 | 6.7  |
|     | BnGMS0713 | -   | -     | -     | -    | 186 | -1.79 | 0.038 | 5.6  |
|     | BoGMS1897 | 219 | -1.92 | 0.043 | 5.3  | 219 | -2.71 | 0.004 | 12.1 |
|     | BrGMS2901 | 237 | 4.04  | 0.028 | 6.5  | 237 | 4.86  | 0.008 | 10.0 |
|     | BnGMS0749 | 303 | -4.04 | 0.028 | 6.5  | 303 | -4.86 | 0.008 | 10.0 |
|     | BnGMS0509 | 227 | 0.98  | 0.038 | 5.6  | -   | -     | -     | -    |
|     | BnGMS0336 | -   | -     | -     | -    | 351 | -3.81 | 0.003 | 12.4 |
| TSW |           | 398 | 0.12  | 0.030 | 6.3  | -   | -     | -     | -    |
|     | BrEMS0015 | -   | -     | -     | -    | 410 | 0.13  | 0.013 | 8.7  |
|     |           | -   | -     | -     | -    | 410 | 0.13  | 0.013 | 8.7  |
|     | BnGMS0373 | -   | -     | -     | -    | 290 | 0.12  | 0.020 | 7.5  |
|     | BoGMS1565 | -   | -     | -     | -    | 253 | -0.13 | 0.018 | 7.7  |
|     | BoGMS2719 | -   | -     | -     | -    | 294 | 0.42  | 0.035 | 5.9  |
|     | BnEMS0020 | -   | -     | -     | -    | 357 | 0.42  | 0.035 | 5.9  |
|     | BnGMS0336 | -   | -     | -     | -    | 364 | -0.14 | 0.013 | 8.7  |

**Table S7.** Characteristics of SSR markers associated with heterosis effect for phenotypic traits in CMS/DH×*Rfo* hybrids.

Effect – estimates of regression coefficients, % – The percentage of total phenotypic variance explained by markers, PIC – polymorphic information content, PH – plant height, BPP – no. of branches per plant, SPP – no. of siliques per plant, SL – silique length, SPS – no. of seeds per silique, TSW – thousand seed weight.

| Trait | Marker    | 2015   |        |         |      | 2016   |        |         |      |
|-------|-----------|--------|--------|---------|------|--------|--------|---------|------|
|       |           | Allele | Effect | p-value | %    | Allele | Effect | p-value | %    |
| PH    | BrGMS1490 | -      | -      | -       | -    | 358    | 3.43   | 0.046   | 5.1  |
|       | BrGMS1804 | 348    | -2.55  | 0.048   | 5.0  | -      | -      | -       | -    |
|       | BrGMS1218 | -      | -      | -       | -    | 295    | 4.03   | 0.018   | 7.7  |
|       | BrGMS3688 | -      | -      | -       | -    | 265    | -4.99  | 0.007   | 10.5 |
|       | BnEMS1119 | 227    | -4.08  | 0.039   | 5.5  | -      | -      | -       | -    |
|       |           | -      | -      | -       | -    | 226    | 2.65   | 0.047   | 5.0  |
|       | BoGMS1740 | 237    | 13.06  | 0.008   | 10.1 | -      | -      | -       | -    |
|       | BoGMS3608 | 197    | 3.98   | 0.044   | 5.2  | -      | -      | -       | -    |
|       |           | -      | -      | -       | -    | 207    | -3.31  | 0.012   | 8.8  |
|       | BrGMS4057 | -      | -      | -       | -    | 209    | 3.25   | 0.017   | 7.9  |

|            |           |     |        |       |      |     |       |       |      |
|------------|-----------|-----|--------|-------|------|-----|-------|-------|------|
|            | BrGMS2252 | -   | -      | -     | -    | 206 | -4.74 | 0.015 | 8.3  |
|            |           | 219 | 4.77   | 0.037 | 5.7  | -   | -     | -     | -    |
| <b>BPP</b> | BrGMS2025 | 125 | 2.53   | 0.046 | 5.1  | -   | -     | -     | -    |
|            | BoGMS1740 | 226 | 0.86   | 0.034 | 5.9  | -   | -     | -     | -    |
|            |           | -   | -      | -     | -    | 241 | -1.13 | 0.031 | 6.1  |
|            | BnGMS0353 | 313 | -1.23  | 0.002 | 13.7 | -   | -     | -     | -    |
|            | BrGMS4057 | 207 | -0.95  | 0.020 | 7.4  | -   | -     | -     | -    |
| <b>SPP</b> | BnGMS0662 | 217 | -1.08  | 0.012 | 8.9  | -   | -     | -     | -    |
|            | BrEMS0015 | 400 | -68.6  | 0.027 | 6.6  | -   | -     | -     | -    |
|            |           | 410 | 67.9   | 0.045 | 5.1  | -   | -     | -     | -    |
|            | BrGMS3653 | 162 | -194.3 | 0.024 | 6.9  | -   | -     | -     | -    |
|            | BnGMS0353 | 313 | -104.7 | <.001 | 17.6 | -   | -     | -     | -    |
|            | BrGMS4057 | 207 | -61.5  | 0.049 | 4.9  | -   | -     | -     | -    |
|            | BnGMS0662 | 217 | -92.8  | 0.004 | 11.8 | -   | -     | -     | -    |
|            | BrGMS2901 | 237 | -73.0  | 0.019 | 7.5  | -   | -     | -     | -    |
| <b>SL</b>  | BrEMS0015 | -   | -      | -     | -    | 408 | 7.26  | 0.010 | 9.3  |
|            | BrGMS3653 | 162 | -4.36  | 0.020 | 7.5  | -   | -     | -     | -    |
|            | BrGMS3688 | -   | -      | -     | -    | 265 | 2.13  | 0.037 | 5.7  |
|            | BoGMS1740 | 241 | -3.34  | 0.013 | 8.7  | -   | -     | -     | -    |
|            | BoGMS3608 | -   | -      | -     | -    | 197 | 2.59  | 0.022 | 7.1  |
|            | BrGMS4031 | -   | -      | -     | -    | 219 | 7.26  | 0.010 | 9.3  |
|            | BrGMS2431 | -   | -      | -     | -    | 219 | 7.26  | 0.010 | 9.3  |
|            | BnGMS0662 | 217 | -1.48  | 0.039 | 5.5  | -   | -     | -     | -    |
|            |           | -   | -      | -     | -    | 221 | 1.45  | 0.048 | 5.0  |
|            | BrGMS2901 | 277 | -1.61  | 0.035 | 5.8  | -   | -     | -     | -    |
|            | BnGMS0336 | 351 | 6.37   | 0.015 | 8.2  | -   | -     | -     | -    |
| <b>SPS</b> | BrEMS0015 | 398 | -1.10  | 0.027 | 6.6  | -   | -     | -     | -    |
|            | BrGMS1490 | 400 | -2.38  | 0.015 | 8.2  | -   | -     | -     | -    |
|            | BrGMS3688 | 261 | 1.25   | 0.019 | 7.5  | -   | -     | -     | -    |
|            |           | 265 | -1.18  | 0.050 | 4.9  | -   | -     | -     | -    |
|            | BoGMS3608 | -   | -      | -     | -    | 197 | 1.67  | 0.010 | 9.3  |
|            | BrGMS2252 | 206 | -1.31  | 0.039 | 5.6  | -   | -     | -     | -    |
|            | BnGMS0662 | -   | -      | -     | -    | 221 | 0.87  | 0.038 | 5.6  |
|            | BnGMS0713 | -   | -      | -     | -    | 182 | -0.91 | 0.031 | 6.2  |
|            | BnGMS0336 | 364 | -0.90  | 0.044 | 5.2  | -   | -     | -     | -    |
| <b>TSW</b> | BrGMS4252 | -   | -      | -     | -    | 292 | -0.13 | 0.020 | 7.4  |
|            | BrGMS3688 | 261 | 0.12   | 0.046 | 5.1  | -   | -     | -     | -    |
|            | BoGMS1740 | -   | -      | -     | -    | 226 | -0.08 | 0.030 | 6.3  |
|            | BoGMS0573 | -   | -      | -     | -    | 353 | -0.35 | 0.016 | 8.0  |
|            |           | -   | -      | -     | -    | 357 | 0.12  | 0.006 | 10.9 |
|            | BoGMS3538 | -   | -      | -     | -    | 227 | 0.38  | 0.009 | 9.7  |
|            | BnGMS0662 | -   | -      | -     | -    | 217 | 0.08  | 0.038 | 5.6  |
